# Supplementary material for: Enhanced stability of complex coacervate core micelles following different core-crosslinking strategies
Source: Royal Society of Chemistry journal article supplement (doi:10.1039/d2sm00088a), 2022-01-01
Supplement: d2sm00088a1.pdf [file d2sm00088a1.pdf]

Electronic Supplementary Material (ESI) for Soft Matter.

This journal is © The Royal Society of Chemistry 2022

Electronic Supplementary Information for Soft Matter manuscript:

## Enhanced stability of complex coacervate core micelles following different core-crosslinking strategies

Riahna Kembaren,<sup>a,b</sup> J. Mieke Kleijn,<sup>a</sup> Jan Willem Borst,<sup>b</sup> Marleen Kamperman,<sup>c</sup> and Anton H. Hofman<sup>\*c</sup>

<sup>a</sup>Physical Chemistry and Soft Matter, Wageningen University & Research, Stippeneng 4, 6708 WE Wageningen, The Netherlands

<sup>b</sup>Laboratory of Biochemistry, Microspectroscopy Research Facility, Wageningen University & Research, Stippeneng 4, 6708 WE Wageningen, The Netherlands

<sup>c</sup>Polymer Science, Zernike Institute for Advanced Materials, Nijenborgh 4, University of Groningen, 9747 AG Groningen, The Netherlands

<sup>1</sup>H-NMR spectra of the homopolymer poly(2-vinylpyridine)<sub>44</sub> (P2VP<sub>44</sub>) before and after quaternization (Fig. S1). These data show that the quaternization and deprotection of the homopolymer were successful, so that the quaternization procedure could also be applied to the diblock copolymer poly(2-vinylpyridine)<sub>128</sub>-*block*-poly(ethylene oxide)<sub>477</sub> (P2VP<sub>128</sub>-*b*-PEO<sub>477</sub>).

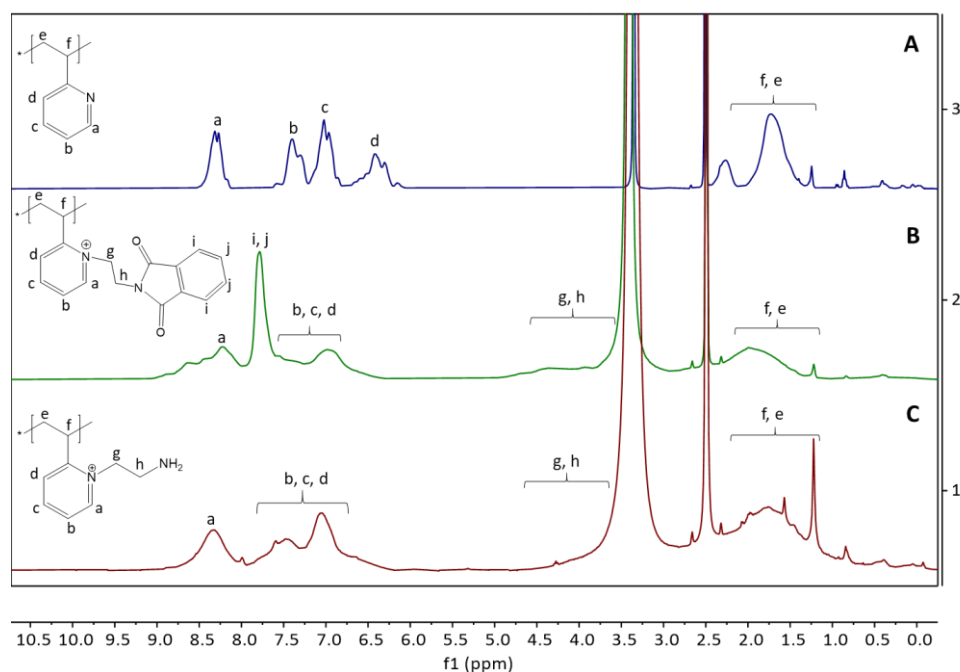

**Fig. S1** <sup>1</sup>H-NMR spectra of the homopolymer P2VP<sub>44</sub>. (A) Homopolymer before quaternization, (B) homopolymer after quaternization using *N*-(2-bromoethyl)phthalimide, (C) quaternized homopolymer after deprotection using hydrazine hydrate. Spectra A, B, and C were recorded in DMSO-*d*<sub>6</sub>.

The quaternization degree of the homopolymer P2VP<sub>44</sub> was calculated from the ratio of the integral area of the aromatic rings and the integral area of P2VP's backbone, and was about 92% (Fig. S2).

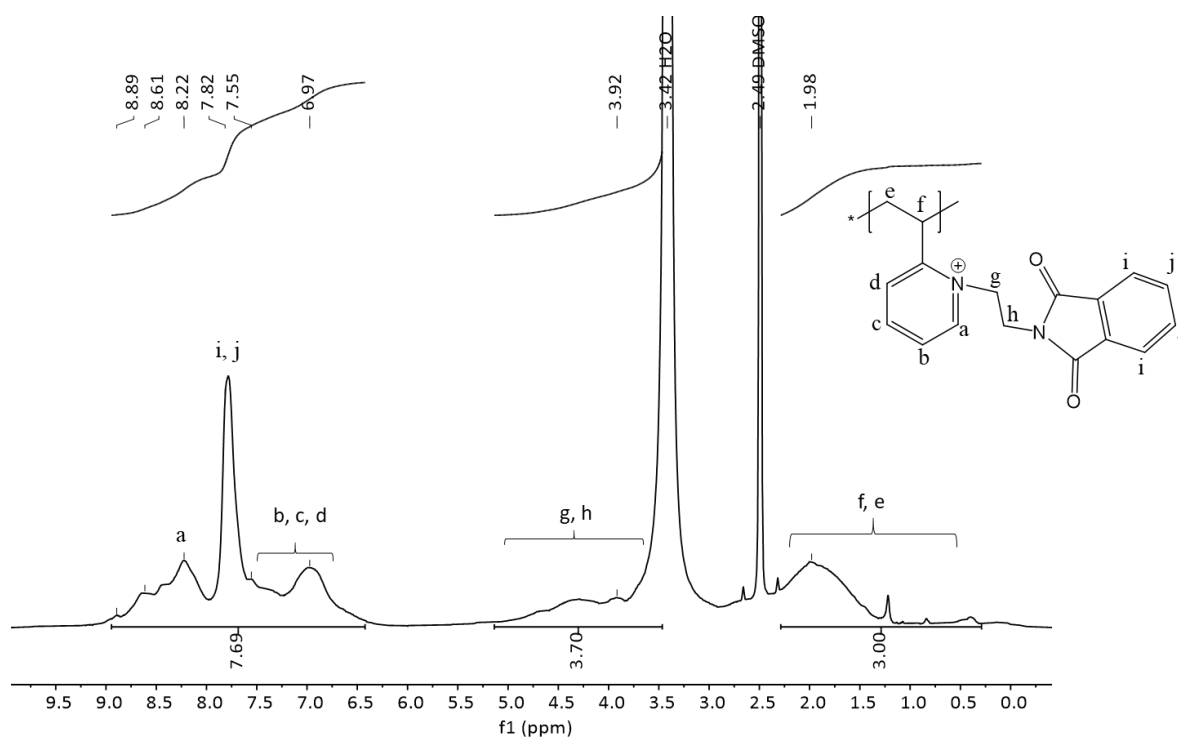

**Fig. S2** <sup>1</sup>H-NMR spectrum of the homopolymer P2VP<sub>44</sub> after quaternization using *N*-(2-bromoethyl)phthalimide. The spectrum was recorded in DMSO-d<sub>6</sub>. Degree of quaternization (DQ) was calculated from the ratio of the integral area of the aromatic rings and the integral area of P2VP's backbone.  $DQ = (((7.69 - 4)/4) : (3/3)) * 100\% = 92\%$ .

$^1\text{H-NMR}$  spectrum of the diblock copolymer poly(2-vinylpyridine)<sub>128</sub>-*block*-poly(ethylene oxide)<sub>477</sub> (P2VP<sub>128</sub>-*b*-PEO<sub>477</sub>) before quaternization in  $\text{CDCl}_3$ , to confirm the composition of P2VP-*b*-PEO before quaternization (Fig. S3).

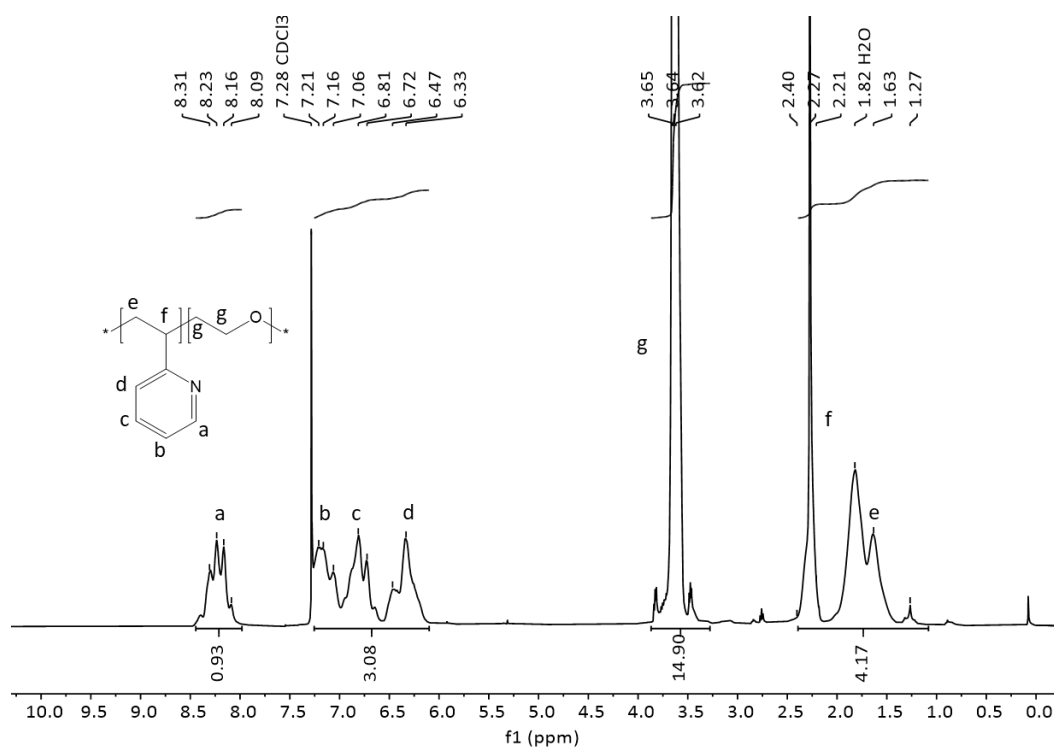

**Fig. S3**  $^1\text{H-NMR}$  spectrum of the neat diblock copolymer P2VP<sub>128</sub>-*b*-PEO<sub>477</sub> in  $\text{CDCl}_3$ . The block ratio of P2VP and PEO was calculated from the ratio of the integral area of the aromatic rings and the integral area of PEO. Block ratio =  $(0.93 + 3.08) : 14.9 = 4.0 : 14.9 = 128 : 477$ .

The quaternization degree of the diblock copolymer P2VP<sub>128</sub>-*b*-PEO<sub>477</sub> was calculated from the ratio of the integral area of the aromatic region and the integral area of P2VP's backbone, and was about 85% (Fig. S4).

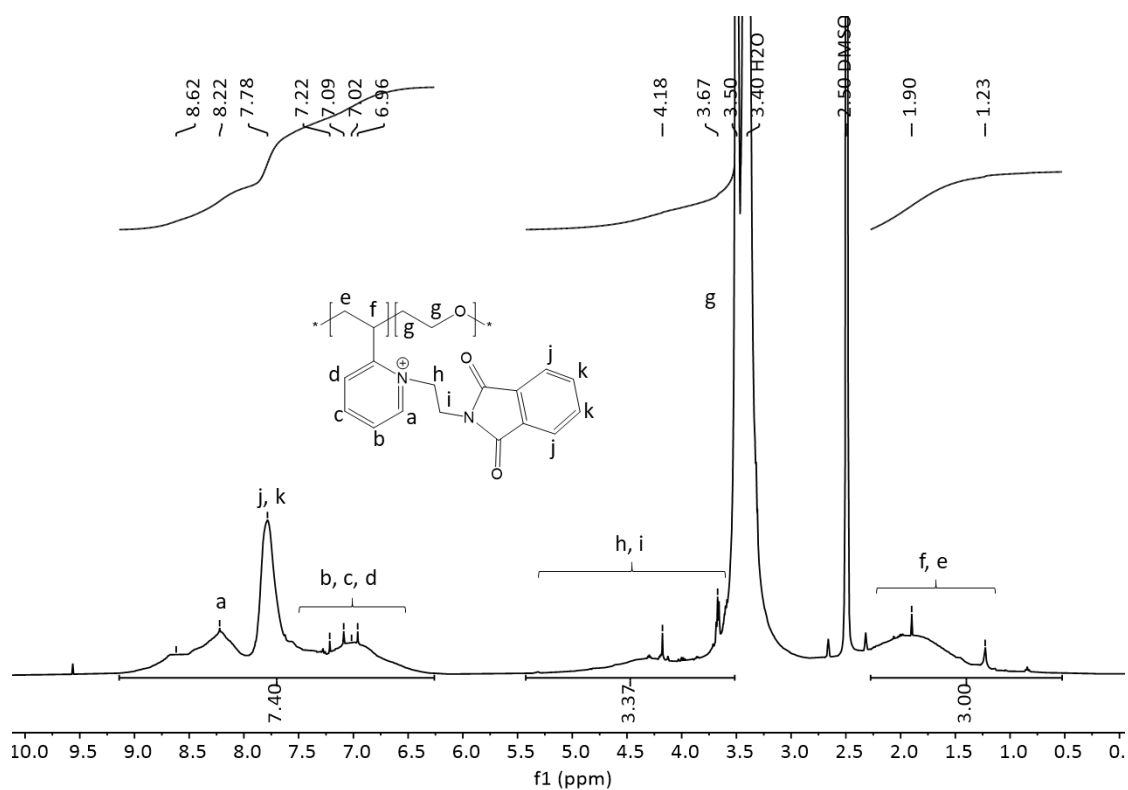

**Fig. S4** <sup>1</sup>H-NMR spectrum of the diblock copolymer P2VP<sub>128</sub>-*b*-PEO<sub>477</sub> after quaternization using *N*-(2-bromoethyl)phthalimide. The spectrum was recorded in DMSO-*d*<sub>6</sub>. The degree of quaternization (DQ) was calculated from the ratio of the integral area of the aromatic rings and the integral area of P2VP's backbone.  $DQ = ((7.4 - 4) / 4) : (3/3) * 100\% = 85\%$ .

For determination of the CMC, a 2.50  $\mu\text{M}$  C3M stock solution was diluted with buffer and analyzed by dynamic light scattering (DLS). From this dilution series, the CMC was estimated to be equal to or lower than 0.59  $\mu\text{M}$  – at even lower polymer concentrations the measurement becomes inaccurate due to relatively strong scattering of the buffer (17 – 20 kHz).

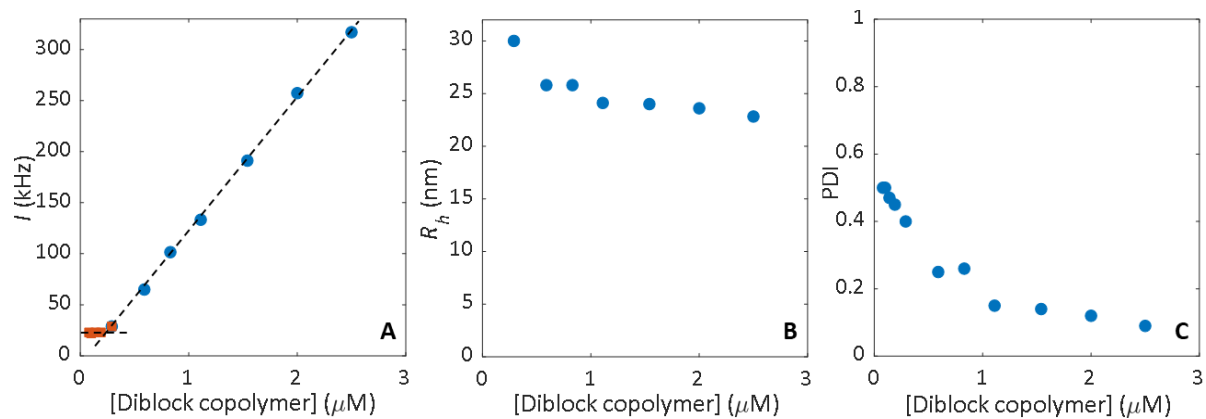

**Fig. S5** Determination of the critical micelle concentration (CMC) at the PMC. DLS results are plotted as a function of the quaternized P2VP<sub>128</sub>-*b*-PEO<sub>477</sub> concentration. (A) Absolute scattering intensity ( $I$ ), (B) hydrodynamic radius ( $R_h$ ), and (C) polydispersity index (PDI). Dashed lines indicate the slope of the scattering intensity values during dilution. Orange data points indicate weak scattering below the estimated CMC.
